# Supplementary material for: Prognostic Value and Clinicopathological Features of MicroRNA‐206 in Various Cancers: A Meta‐Analysis
Source: Hindawi journal article supplement (doi:10.1155/2020/2159704), 2020-01-01

Study %  
ID HR (95% CI) Weight

Chen (2017) 1.88 (1.18, 3.01) 41.33

Cui (2018) 1.52 (1.01, 2.28) 54.67

Ling (2014) 6.60 (1.46, 29.70) 3.99

Overall (I-squared = 43.5%, p = 0.170) 1.76 (1.30, 2.38) 100.00

.0337

1

29.7

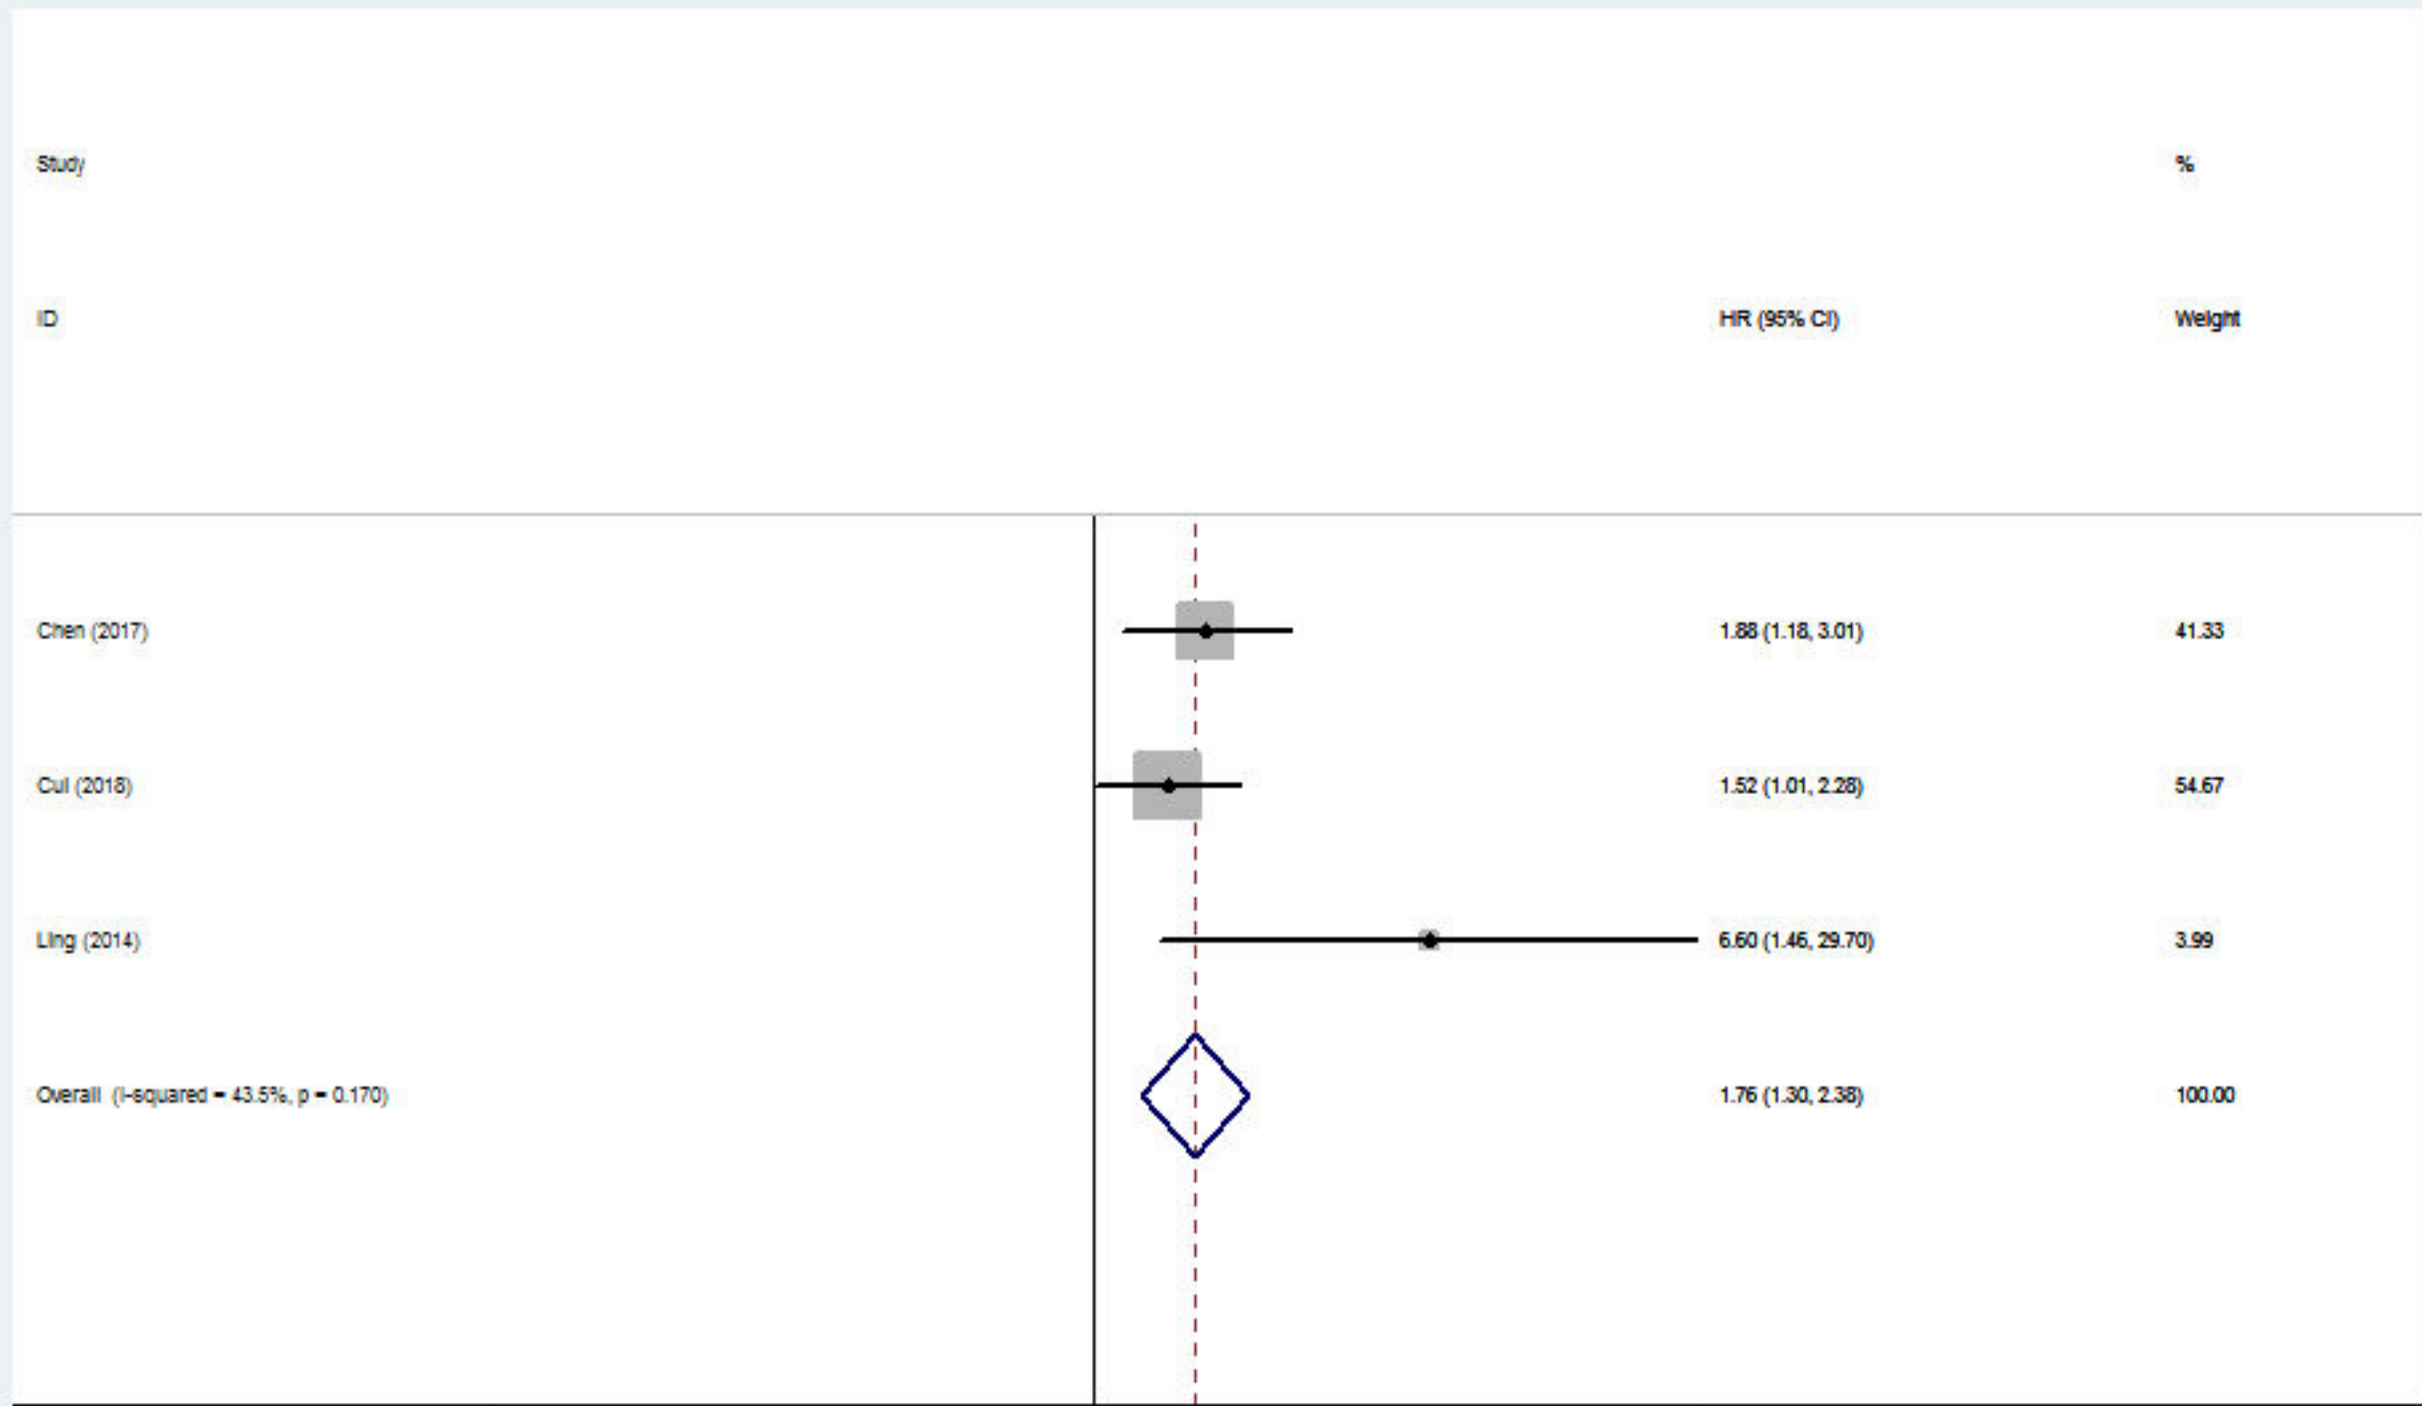

Supplement: f3 [file 2159704.f3.pdf]
