# Supplementary material for: Prognostic Value and Clinicopathological Features of MicroRNA‐206 in Various Cancers: A Meta‐Analysis
Source: Hindawi journal article supplement (doi:10.1155/2020/2159704), 2020-01-01

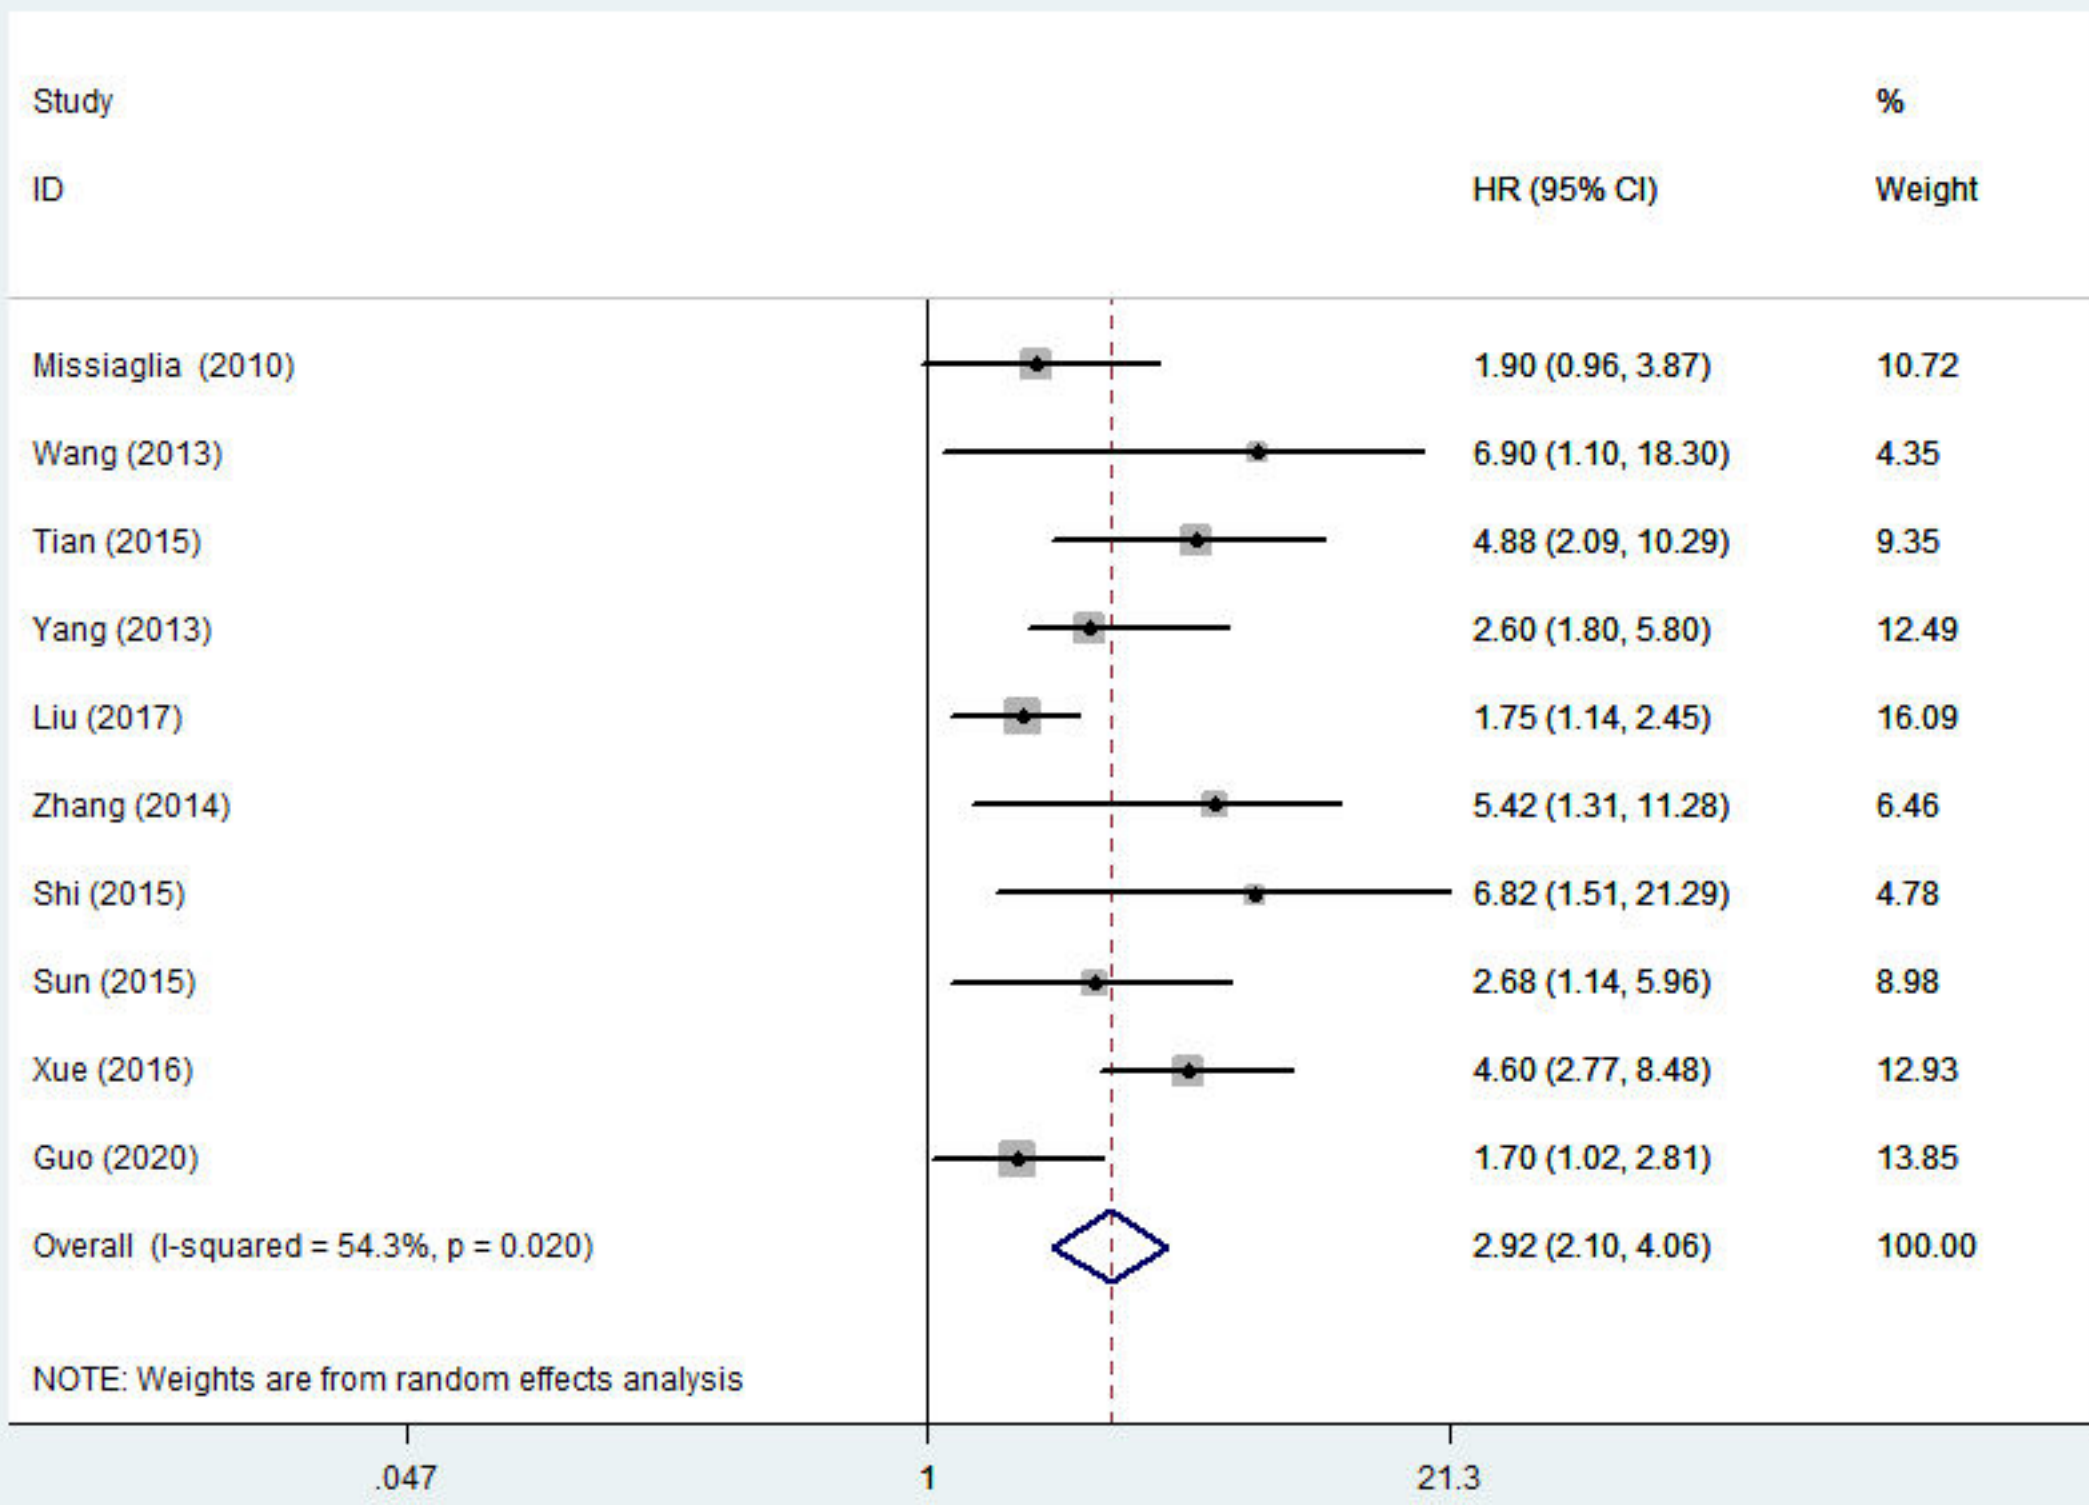

Supplement: f7 [file 2159704.f7.pdf]
